# Supplementary material for: Magnetically frustrated synthetic end member Mn2(PO4)OH in the triplite–triploidite family
Source: Royal Society of Chemistry journal article supplement (doi:10.1039/c7dt01707c), 2017-01-01
Supplement: c7dt01707c2.pdf [file c7dt01707c2.pdf]

ELECTRONIC SUPPLEMENTARY INFORMATION (ESI)

**Highly frustrated synthetic end member  $Mn_2(PO_4)OH$   
in the triplite-triploidite family**

Olga V. Yakubovich,<sup>a</sup> Larisa V. Shvanskaya,<sup>a,b</sup> Olga V. Dimitrova,<sup>a</sup> Olga S. Volkova<sup>a,b,c</sup> and Alexander N. Vasiliev<sup>a,b,d</sup>

<sup>a</sup>*M. V. Lomonosov Moscow State University, Moscow 119991, Russia*

<sup>b</sup>*National University of Science and Technology "MISIS", Moscow 119049, Russia*

<sup>c</sup>*Ural Federal University, Ekaterinburg 620002, Russia*

<sup>d</sup>*National Research South Ural State University, Chelyabinsk 454080, Russia*

E-mail: [vasil@mig.phys.msu.ru](mailto:vasil@mig.phys.msu.ru)

**Table S1** Synthetic phosphates and arsenates with triploidite- and triplite-type crystal structures\*

| Chemical formula                                   | <i>a</i> , Å | <i>b</i> , Å | <i>c</i> , Å | $\beta$ , grad | <i>V</i> , Å <sup>3</sup> | Reference |
|----------------------------------------------------|--------------|--------------|--------------|----------------|---------------------------|-----------|
| Triploidite structural group, space group $P2_1/a$ |              |              |              |                |                           |           |
| $Mn_2(PO_4)OH$ , synth. triploidite                | 12.411(1)    | 13.323(1)    | 10.014(1)    | 108.16(1)      | 1573.3                    | This work |
| $Fe_2(PO_4)OH$ , synth. wolfeite                   | 12.265(1)    | 13.197(1)    | 9.739(1)     | 108.63(1)      | 1493.8                    | 1         |
| $Mg_2(PO_4)F$ , synth. wagnerite                   | 11.961(2)    | 12.731(3)    | 9.650(1)     | 108.22(1)      | 1395.8                    | 2         |
| $Mg_2(PO_4)OH$ , synth. hydroxylwagnerite          | 12.069(4)    | 12.859(3)    | 9.656(3)     | 108.49(3)      | 1421.2                    | 3         |
| $Cd_2(PO_4)OH$                                     | 13.097(3)    | 14.089(3)    | 10.566(2)    | 108.38(3)      | 1850.2                    | 4         |
| $Zn_2(PO_4)[F_{0.86}(OH)_{0.14}]$                  | 11.972(1)    | 12.793(1)    | 9.690(1)     | 108.26(1)      | 1409.3                    | 5         |
| $ZnFe(PO_4)OH$                                     | 12.154(3)    | 13.149(6)    | 9.678(3)     | 109.00(2)      | 1462.4                    | 6         |
| $Co_2(PO_4)F$                                      | 11.955(4)    | 12.802(4)    | 9.712(2)     | 108.14(2)      | 1417.0                    | 7         |
| $Mn_2(AsO_4)OH$ , synth. sarkinite                 | 12.780(2)    | 13.613(2)    | 10.219(2)    | 108.83(1)      | 1682.5                    | 8         |
| Triplite structural group, space group $I2/a$      |              |              |              |                |                           |           |
| $Mn_2(PO_4)F$ , synth. triplite                    | 12.099(4)    | 6.510(5)     | 10.094(2)    | 106.28(1)      | 763.2                     | 9         |
| $Fe_2(PO_4)F$ , synth. zwieselite                  | 11.999(3)    | 6.489(1)     | 9.890(3)     | 107.72(2)      | 733.5                     | 10        |
| $Co_2(PO_4)F$                                      | 12.018(2)    | 6.437(1)     | 9.674(2)     | 109.17(2)      | 710.7                     | 11        |
| $Cu_2(PO_4)F$                                      | 11.741(3)    | 6.182(1)     | 9.962(2)     | 108.67(2)      | 685.1                     | 12        |
| $Cd_2(PO_4)F$                                      | 12.503(2)    | 6.693(1)     | 10.519(1)    | 106.42(1)      | 844.3                     | 13        |
| $Fe_2(AsO_4)F$                                     | 12.471(1)    | 6.623(1)     | 10.045(1)    | 108.90(1)      | 784.0                     | 14        |
| $Cd_2(AsO_4)F$                                     | 12.737(5)    | 6.847(1)     | 10.694(4)    | 106.00(6)      | 896.5                     | 15        |

\*Originally reported unit-cells are transformed to  $P2_1/a$  and  $I2/a$  space-group settings for clear comparison

**Table S2** Atomic coordinates and equivalent isotropic displacement parameters ( $\text{\AA}^2$ ) for the  $Mn_2(PO_4)OH$ .  $U(\text{eq})$  is defined as one third of the trace of the orthogonalized  $U^{ij}$  tensor

| Atom | <i>x</i>     | <i>y</i>    | <i>z</i>   | $U(\text{eq})$ |
|------|--------------|-------------|------------|----------------|
| Mn1  | 0.53593(6)   | 0.17404(5)  | 0.89405(5) | 0.00927(15)    |
| Mn2  | 0.45274(6)   | 0.32274(5)  | 1.07644(5) | 0.00871(15)    |
| Mn3  | -0.05631(6)  | 0.07540(5)  | 0.58293(5) | 0.00852(15)    |
| Mn4  | 0.03498(6)   | 0.07151(5)  | 0.90274(5) | 0.00874(15)    |
| Mn5  | -0.20481(6)  | 0.25149(5)  | 0.80459(5) | 0.01021(15)    |
| Mn6  | 0.19087(6)   | 0.26892(5)  | 0.68192(5) | 0.00929(15)    |
| Mn7  | -0.31283(6)  | -0.02130(5) | 0.68738(5) | 0.00811(15)    |
| Mn8  | 0.29041(6)   | -0.00337(5) | 0.80284(5) | 0.01058(15)    |
| P1   | 0.62138(10)  | 0.42769(8)  | 0.92499(8) | 0.0062(2)      |
| P2   | -0.12167(10) | 0.17766(8)  | 1.07798(8) | 0.0062(2)      |
| P3   | 0.11789(10)  | 0.32649(8)  | 0.92500(8) | 0.0061(2)      |
| P4   | 0.38508(10)  | 0.07765(8)  | 1.07615(8) | 0.0061(2)      |
| O1   | -0.0248(3)   | 0.0923(2)   | 1.0608(2)  | 0.0096(6)      |
| O2   | 0.0218(3)    | 0.2353(2)   | 0.8835(2)  | 0.0101(6)      |
| O3   | 0.2614(3)    | 0.0469(2)   | 0.9731(2)  | 0.0114(6)      |
| O4   | 0.4701(3)    | 0.1626(2)   | 1.0434(2)  | 0.0103(6)      |

|     |            |            |           |           |
|-----|------------|------------|-----------|-----------|
| O5  | 0.3113(3)  | 0.1628(2)  | 0.7944(2) | 0.0119(6) |
| O6  | 0.5173(3)  | 0.0121(2)  | 0.8778(2) | 0.0101(6) |
| O7  | 0.5192(3)  | 0.3420(2)  | 0.9302(2) | 0.0104(6) |
| O8  | -0.1877(3) | 0.0826(2)  | 0.8017(2) | 0.0119(6) |
| O9  | 0.0676(3)  | 0.0327(2)  | 0.7447(2) | 0.0114(6) |
| O10 | 0.3313(3)  | 0.3844(2)  | 0.6736(2) | 0.0099(6) |
| O11 | -0.2980(3) | 0.4040(2)  | 0.8413(2) | 0.0104(6) |
| O12 | 0.5724(3)  | 0.2190(2)  | 0.7401(2) | 0.0100(6) |
| O13 | -0.1896(3) | 0.3497(2)  | 0.6698(2) | 0.0089(6) |
| O14 | 0.4704(3)  | 0.4778(2)  | 1.1152(2) | 0.0096(6) |
| O15 | -0.2743(3) | 0.0545(2)  | 0.5442(2) | 0.0112(6) |
| O16 | 0.7629(3)  | 0.2029(2)  | 0.9670(2) | 0.0090(6) |
| O17 | 0.0329(3)  | 0.0864(2)  | 0.4509(2) | 0.0103(6) |
| O18 | -0.0255(3) | 0.2298(2)  | 0.6195(2) | 0.0090(6) |
| O19 | 0.2356(2)  | 0.2980(2)  | 1.0344(2) | 0.0109(6) |
| O20 | 0.1807(3)  | 0.3591(2)  | 0.8314(2) | 0.0101(6) |
| H1  | 0.052(5)   | -0.0260(7) | 0.734(4)  | 0.034(15) |
| H2  | 0.285(3)   | 0.174(3)   | 0.848(2)  | 0.020(13) |
| H3  | 0.560(5)   | 0.2782(6)  | 0.731(4)  | 0.033(15) |
| H4  | -0.212(3)  | 0.077(3)   | 0.857(2)  | 0.025(14) |

**Table S3** Bond valence data for synthetic triploidite,  $\text{Mn}_2(\text{PO}_4)\text{OH}$

| Atom     | Mn1  | Mn2  | Mn3          | Mn4          | Mn5  | Mn6  | Mn7  | Mn8  | P1   | P2   | P3   | P4   | H1   | H2   | H3   | H4   | $\Sigma$ |
|----------|------|------|--------------|--------------|------|------|------|------|------|------|------|------|------|------|------|------|----------|
| O1       |      |      |              | 0.30<br>0.30 |      |      |      |      |      | 1.19 |      |      |      |      |      | 0.04 | 1.83     |
| O2       |      |      |              | 0.34         | 0.35 |      |      |      |      |      | 1.25 |      |      |      |      |      | 1.94     |
| O3       |      |      |              | 0.34         |      |      |      | 0.24 |      |      |      | 1.26 |      | 0.07 |      |      | 1.91     |
| O4       | 0.37 | 0.34 |              |              |      |      |      |      |      |      |      | 1.22 |      | 0.05 | 0.09 |      | 2.07     |
| O5(OH)   | 0.32 |      |              |              |      | 0.45 |      | 0.31 |      |      |      |      |      | 0.88 |      |      | 1.96     |
| O6       | 0.36 |      |              |              |      |      |      | 0.35 |      |      |      | 1.24 |      |      |      |      | 1.95     |
| O7       | 0.25 | 0.40 |              |              |      |      |      |      | 1.21 |      |      |      |      |      |      |      | 1.86     |
| O8(OH)   |      |      |              | 0.33         | 0.28 |      | 0.44 |      |      |      |      |      |      |      |      | 0.87 | 1.92     |
| O9(OH)   |      |      | 0.45         | 0.38         |      |      |      | 0.35 |      |      |      |      | 0.83 |      |      |      | 2.01     |
| O10      |      |      |              |              |      | 0.42 | 0.34 |      |      |      |      | 1.19 |      |      | 0.02 |      | 1.97     |
| O11      |      |      |              |              | 0.23 |      |      | 0.34 | 1.25 |      |      |      |      |      | 0.05 |      | 1.87     |
| O12(OH)  | 0.39 | 0.45 |              |              | 0.36 |      |      |      |      |      |      |      |      |      | 0.84 |      | 2.04     |
| O13      |      |      |              |              | 0.36 |      |      | 0.27 |      | 1.23 |      |      | 0.09 |      |      |      | 1.95     |
| O14      |      | 0.41 |              |              |      |      | 0.37 |      | 1.21 |      |      |      |      |      |      |      | 1.99     |
| O15      |      |      | 0.43         |              |      |      | 0.35 |      | 1.23 |      |      |      |      |      |      |      | 2.01     |
| O16      | 0.33 |      |              |              | 0.30 |      |      |      |      | 1.22 |      |      |      |      |      | 0.09 | 1.94     |
| O17      |      |      | 0.43<br>0.31 |              |      |      |      |      |      |      | 1.26 |      | 0.08 |      |      |      | 2.08     |
| O18      |      |      | 0.42         |              |      | 0.40 |      |      |      | 1.20 |      |      |      |      |      |      | 2.02     |
| O19      |      | 0.43 |              |              |      | 0.33 |      |      |      |      | 1.23 |      |      |      |      |      | 1.99     |
| O20      |      |      |              |              |      | 0.30 | 0.40 |      |      |      |      | 1.21 |      |      |      |      | 1.91     |
| $\Sigma$ | 2.02 | 2.03 | 2.04         | 1.99         | 1.88 | 1.90 | 1.90 | 1.86 | 4.90 | 4.84 | 4.95 | 4.91 | 1.00 | 1.00 | 1.00 | 1.00 |          |

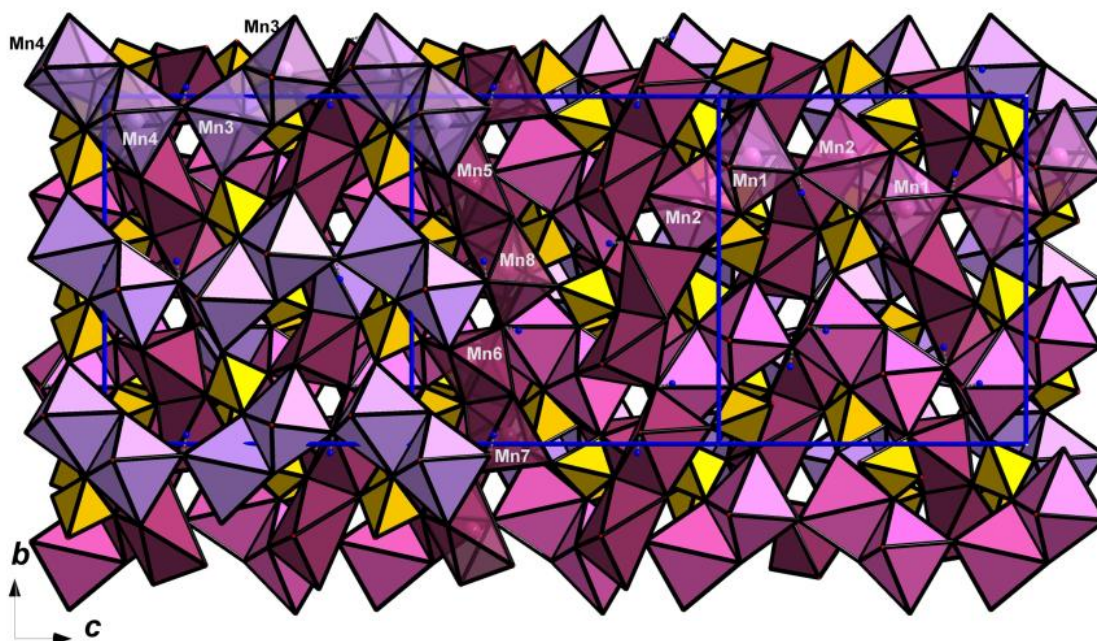

**Fig. S1** The  $\text{Mn}_2(\text{PO}_4)\text{OH}$  crystal structure in  $yz$  projection.

## References

- 1 F. Hatert, *Acta Crystallogr.*, 2007, **C63**, i119–i121.
- 2 A. Amisano-Canesi and G. Chiari, *Eur. Crystallogr. Meeting*, 1992, 14, 189-189.
- 3 G. Raade and C. Rømming, *Z. Kristallogr.*, 1986, **177**, 1-13.
- 4 T. Đorđević and U. Kolitsch, *Miner. Petrol.*, 2013, **107**, 243-251.
- 5 K. I. Taasti, A. N. Christensen, P. Norby, J. C. Hanson, B. Lebech, H. J. Jakobsen and J. Skibsted, *J. Solid State Chem.*, 2002, **164**, 42-50.
- 6 P. A. Sandomirskii, M. A. Simonov, N. V. Belov, *Dokl. Akad. Nauk SSSR*, 1975, **220**, 89-92 (in Russian).
- 7 M. Leblanc, I. Collin-Fèvre and G. Férey, *J. Magnetism and Magnetic Materials*, 1997, **167**, 71-79.
- 8 N. Stock, G. D. Stucky and A. K. Cheetham, *Z. Anorg. Allg. Chem.*, 2002, **628**, 357-362.
- 9 J. R. Rea and E. Kostiner, *Acta Crystallogr.*, 1972, **B28**, 2525-2529.
- 10 O. V. Yakubovich, M. A. Simonov, E. N. Matvienko, N. V. Belov, *Doklady Akademii Nauk SSSR*, 1978, **238**, 576-579 (in Russian).
- 11 H. Ben Yahia, M. Shikano and H. Kobayashi, *Z. Kristallogr.*, 2014, **229**, 775–781.
- 12 J. R. Rea and E. Kostiner, *Acta Crystallogr.*, 1976, **B32**, 1944-1947.
- 13 J. R. Rea and E. Kostiner, *Acta Crystallogr.*, 1974, **B30**, 2901-2903.
- 14 T. Berrocal, J. L. Mesa, J. L. Pizarro, M. K. Urriaga, M. I. Arriortua and T. Rojo, *J. Solid State Chem.*, 2006, **179**, 1659–1667.
- 15 G. Engel, *J. Less. Comm. Met.*, 1989, **154**, 367-374.
